# Supplementary material for: Efficacy of team-based collaborative care for distressed patients in secondary prevention of chronic coronary heart disease (TEACH): study protocol of a multicenter randomized controlled trial
Source: PubMed Central journal article supplement (PMC7731481; doi:10.1186/s12872-020-01810-9), 2020-12-10
Supplement: 12872_2020_1810_MOESM1_ESM.pdf [file 12872_2020_1810_MOESM1_ESM.pdf]

Pat. ID:

Site Code:

Date:

*Only register Patient ID. if consent is given and case has been created in SecuTrial.*

### Patient identification and pre-screening in-hospital

1. Sex
  - male
  - female
  - diverse
  
2. Date of birth      \_\_ (mm) \_\_\_\_ (yyyy)    **!stop in case of age <18y. or >85y.**
  
3. Confirmed CHD, documented by at least one of the following criteria:
  - Coronary angiography > 50% Stenosis in  $\geq 1$  main coronary vessel
  - Confirmed acute coronary syndrome
  - History of coronary revascularization, i.e. percutaneous intervention (PCI) or coronary bypass surgery; PCI or bypass surgery may have been performed during the current hospitalization.
  
4. Sufficient knowledge of German and reading skills (impression by visiting, if necessary in case of uncertainty ask the patient)
  - no, then stop!**     yes
  
5. Severe comorbidities with an estimated survival of <1 year
  - no                       **yes, which?** \_\_\_\_\_ **then stop!**
  
6. Severe mental illness according to the patient record (e.g. acute psychosis, addictions other than tobacco)
  - no                       **yes, which?** \_\_\_\_\_ **then stop!**
  
7. Severe cognitive impairment / dementia
  - no                       **yes, then stop!**
  
8. Patient consent #1 (screening procedure)                       yes                       **no, then stop!**
  
9. HADS Score: \_\_\_\_\_; PSS-4 Score: \_\_\_\_\_
  
10. Patient possibly eligible                                               yes                       no
  
11. Type of contact agreed upon                                               by phone                       by E-mail

Pat. ID: \_\_\_\_\_

Site Code: \_\_\_\_\_

Date: \_\_\_\_\_

### Screening (t-14) $\geq$ 3 months after Prescreening

*(Reassessment using the HADS and PSS4. Continue only if HADS $>$ 12 and/or PSS-4 $>$ 5):*

#### Exclusion criteria

1. „Have you had new serious physical illnesses since your last hospital stay?“

unknown    no    **yes, which one?** \_\_\_\_\_

**In case of estimated survival  $<$ 1y., then stop!**

2. "Have you had any new serious mental or psychosomatic illnesses since your last hospital stay?" (Note: „serious“ = e.g. acute psychosis, addictions other than tobacco)

unknown    no    **yes, then stop!, which one?** \_\_\_\_\_

3. „Have you had a heart attack since your last hospital stay or did you require heart surgery?“

unknown    no    **yes, then stop!**

4. „Are you already taking part or do you intend to take part in another treatment trial?“

unknown    no    **yes, which ohne?** \_\_\_\_\_

**Then, where appropriate, stop!**

#### Risk factors

1. „Do you smoke?“

not specified    no    yes, number of cigarettes/day \_\_\_\_\_

2. „How much time **per week** do you usually spend with **moderate** physical activity? (Moderate activities refer to moderate physical exertion in which you breathe a little more than normal, such as carrying light loads, cycling at normal speed or swimming at normal speed. This does not include walking at normal speed.)

\_\_\_\_\_ minutes per week



Pat. ID:

Site Code:

Date:

9. „Do you know your current (measurement within the past month) long-term blood sugar value (HbA1c)?“

- no, then end of interview
- yes, value: \_\_\_\_\_(%), Date of measurement: \_\_.\_\_.\_\_\_\_ (dd.mm.yyyy)

10. HbA1c elevated?

- no, if HbA1c<7% or no diabetes known so far
- yes, if HbA1c>=7%
- unknown, if value is missing or too old

Notes (other, e.g. if the patient indicates that he/she is no longer interested in participating in the study)

---

---

---

---

Evaluation:

- No risk factor present („no“ to Items 1, 4, 6, 8 and 10)
- Min. 1 risk factor present („yes“ to Items 1, 4, 6, 8 or 10)
- Unknown (no risk factor present, but values are missing/not current or unclear)

|                                                                                   |                                                                               |                   |
|-----------------------------------------------------------------------------------|-------------------------------------------------------------------------------|-------------------|
|  | TEACH – Team-based treatment of coronary heart disease<br>BASELINE Assessment | Patient ID: _____ |
|                                                                                   | <b>HISTORY and CLINICAL DATA</b>                                              | Date: _____       |

### **1. BASIC DATA AND PHYSICAL EXAMINATION**

1.1. Gender                     male                     female                     diverse

1.2. Date of birth                    \_\_\_\_ . \_\_\_\_ mm.yyyy

1.3. Height                    \_\_\_\_\_ cm

1.4. Weight                    \_\_\_\_\_ kg

1.5. Waist circumference                    \_\_\_\_\_ cm

**1.6. Blood pressure (after 5 minutes of rest, 3 measurements in 2-minute intervals)**

1. Value                    systolic \_\_\_\_\_ mmHg                    diastolic \_\_\_\_\_ mmHg

2. Value                    systolic \_\_\_\_\_ mmHg                    diastolic \_\_\_\_\_ mmHg

3. Value                    systolic \_\_\_\_\_ mmHg                    diastolic \_\_\_\_\_ mmHg

1.7. Heart rate                    (after 5 minutes of rest in sitting position)                    \_\_\_\_\_ bpm

rhythmic                    arrhythmic

1.8. Menopause                    yes no                    unknown

**1.9. Other physical findings (e.g. orthopedic/neurologic limitations)**

yes, specify: \_\_\_\_\_ no  
\_\_\_\_\_

### **2. CARDIOVASCULAR RISK FACTORS (history and external findings)**

2.1. Diabetes mellitus                    yes no                    unknown

2.2. Arteriel hypertension                    yes no                    unknown

2.3. Dyslipidemia                    yes no                    unknown

2.4. Smoking                    yes, no. of cigarettes/day (current) \_\_\_\_\_ Pack years \_\_\_\_\_

no                    e-cigarettes only                    unknown

Ex-smoker, since \_\_\_\_ . \_\_\_\_ mm.yyyy

2.5. Alcoholic drinks per weeks                    \_\_\_\_\_

(dpw=drinks per week; 1 drink = 0.25 l beer oder 0.1 l wine oder 2 cl liquor)

low (< 1dpw)                    moderate (1-10 dpw)                    high (> 10dpw)

|                                                                                   |                                                                               |                                      |
|-----------------------------------------------------------------------------------|-------------------------------------------------------------------------------|--------------------------------------|
|  | TEACH – Team-based treatment of coronary heart disease<br>BASELINE Assessment | Patient ID: _____<br><br>Date: _____ |
|                                                                                   | <b>HISTORY and CLINICAL DATA</b>                                              |                                      |

**2.6. Family history of CVD    yes    no    unknown**

(myocardial infarction or stroke in biological parents, siblings or children below 65 years of age in women and below 55 years of age in men)

If yes, who? \_\_\_\_\_ when? (Age\_\_\_\_; Year \_\_\_\_\_)

Additional information: \_\_\_\_\_

**3. CARDIAC DIAGNOSES (history and external findings)**

**3.1. Coronary heart disease**    1-vessel CHD    2-vessel CHD    3- vessel CHD

Last coronary angiogram, date \_\_\_\_ . \_\_\_\_ mm.jjjj

Additional information (e.g. stenoses): \_\_\_\_\_

CCS class     I     II     III     IV

**3.2. Hx of myocardial infarction**    yes    no    unknown

If yes, when (last)? \_\_\_\_\_

**3.3. Heart failure**    yes    no    unknown

EF \_\_\_\_ %    echokardiogram    ventriculogram

NYHA class     I     II     III     IV

**3.4. Atrial fibrillation / flutter**    yes, current    yes, history of    no    unknown

**3.5. Other cardiac diseases** (cardiomyopathy, Hx of myocarditis, Hx of endocarditis, Valvular heart defects, Cardiac arrhythmias)

Please specify; \_\_\_\_\_

Please specify; \_\_\_\_\_

Please specify; \_\_\_\_\_

|                                                                                   |                                                                               |                                      |
|-----------------------------------------------------------------------------------|-------------------------------------------------------------------------------|--------------------------------------|
|  | TEACH – Team-based treatment of coronary heart disease<br>BASELINE Assessment | Patient ID: _____<br><br>Date: _____ |
|                                                                                   | <b>HISTORY and CLINICAL DATA</b>                                              |                                      |

**4. PREVIOUS CARDIOVASCULAR INTERVENTIONS (history and external findings)**

- 4.1. Percutaneous coronary revascularization      yes   no      unknown  
 If yes, when (last)? \_\_\_\_\_
- 4.2. Coronary bypass surgery      yes   no      unknown  
 If yes, when (last)? \_\_\_\_\_
- 4.3. Implanted cardiac pacemaker or defibrillator?      no   Pacemaker   Defibrillator  
 If yes, since when? \_\_\_\_\_
- 4.3.1 If implanted defibrillator in place: DC shock delivery?      yes   no      unknown  
 If yes, adequate?      yes   no      unknown  
 If yes, when (last)? \_\_\_\_\_  
 If yes, no. of shocks? \_\_\_\_\_
- 4.4. Other cardiovascular interventions/surgery      yes   no      unknown  
 If yes, specify \_\_\_\_\_  
 If yes, when (last)? \_\_\_\_\_  
 If yes, specify \_\_\_\_\_  
 If yes, when (last)? \_\_\_\_\_

**5. COMORBIDITIES (history and external findings)**

- 5.1. Peripheral vascular occlusive disease      yes   no      unknown
- 5.2. Stroke/TIA      yes   no      unknown
- 5.3. Chronic lung disease      yes   no      unknown
- 5.4. Renal insufficiency      yes   no      unknown
- 5.5. Current dialysis treatment      yes   no      unknown
- 5.6. Malignant disease <5 years ago      yes   no      unknown  
 If yes, specify \_\_\_\_\_

|                                                                                   |                                                                               |             |
|-----------------------------------------------------------------------------------|-------------------------------------------------------------------------------|-------------|
|  | TEACH – Team-based treatment of coronary heart disease<br>BASELINE Assessment | Patient ID: |
|                                                                                   | <b>HISTORY and CLINICAL DATA</b>                                              | Date:       |

**5.7. Malignant disease >5 years ago**                      yes no unknown  
 If yes, specify \_\_\_\_\_

**5.8. Thyroid disease**                                      yes no unknown  
 If yes, specify \_\_\_\_\_

**5.9. Inflammatory rheumatic disease**    yes no unknown

**5.10. Hx. of Covid-19 infection**                      yes no unknown  
 If yes, requiring intensive care? yes no

**5.11. Other somatic comorbidities**                      yes no unknown  
 If yes, specify \_\_\_\_\_

**6. MENTAL/PSYCHOSOMATIC COMORBIDITY (history and external findings)**

**6.1. Depression**                                              yes no unknown  
 If yes, diagnosed by physician self-report unknown  
 If yes, >1 episodes? yes no  
 If yes, when (last)? \_\_\_\_\_ (year)

**6.2. Anxiety disorder**                                      yes no unknown  
 If yes, diagnosed by physician self-report unknown

**6.3. Somatoform disorder**                                      yes no unknown  
 If yes, diagnosed by physician self-report unknown

**6.4. Substance abuse / addiction**                      yes no unknown  
 If yes, which substance(s)? \_\_\_\_\_  
 If yes, diagnosed by physician self-report unknown

**6.5. Other diagnoses from ICD-10, chapter F**                      yes no unknown  
 If yes, specify \_\_\_\_\_  
 If yes, specify \_\_\_\_\_



|                                                                                   |                                                                               |                   |
|-----------------------------------------------------------------------------------|-------------------------------------------------------------------------------|-------------------|
|  | TEACH – Team-based treatment of coronary heart disease<br>BASELINE Assessment | Patient ID: _____ |
|                                                                                   | <b>UTILIZATION OF HEALTH CARE or PSYCHOTHERAPY</b>                            | Date: _____       |

**7. UTILIZATION OF HEALTH CARE or PSYCHOTHERAPY**

**7.1. Previous psychiatric treatment or psychotherapy**      yes no

If yes, when? currently previously

If yes, modality? out-patient in-patient both

If yes, type? psychotherapy drug treatment both

**7.2. No. of psychotherapy sessions during last 12 months:** \_\_\_\_\_ sessions

**7.3. No. of psychiatric consultations during last 12 months:** \_\_\_\_\_ consultations

**7.4. No. of physician consultations during last 4 weeks:**

Family physician, \_\_\_\_\_ consultations

Specialists, \_\_\_\_\_ consultations

**7.5. Hospitalizations for heart disease during last 12 months:**

No. \_\_\_\_\_, total no. of days \_\_\_\_\_

**7.6. Cardiac rehabilitation during last 12 months:**

in-patient out-patient both

No. \_\_\_\_\_, total no. of days \_\_\_\_\_

**7.7. Hospitalizations for mental illness during last 12 months  
(including in-patient psychosomatic rehabilitation):**

No. \_\_\_\_\_, total no. of days \_\_\_\_\_

**7.8. Hospitalizations for other reasons during last 12 months:**

No. \_\_\_\_\_, total no. of days \_\_\_\_\_

**7.9. Inability to work during last 12 months:**

No. \_\_\_\_\_, total no. of days \_\_\_\_\_

|                                                                                   |                                                                               |             |
|-----------------------------------------------------------------------------------|-------------------------------------------------------------------------------|-------------|
|  | TEACH – Team-based treatment of coronary heart disease<br>BASELINE Assessment | Patient ID: |
|                                                                                   | <b>MEDICATION</b>                                                             | Date:       |

## 8. DRUGS

### 8.1. Cardiovascular drugs (classification of current drugs)

|                                                       |                                                    |                               |
|-------------------------------------------------------|----------------------------------------------------|-------------------------------|
| <b>ACE inhibitors</b> (e.g. Ramipril)                 | <input type="radio"/> yes <input type="radio"/> no | <input type="radio"/> unknown |
| <b>Angiotensin receptor blockers</b> (e.g. Valsartan) | <input type="radio"/> yes <input type="radio"/> no | <input type="radio"/> unknown |
| <b>Aldosterone antagonists</b> (e.g. Spironolactone)  | <input type="radio"/> yes <input type="radio"/> no | <input type="radio"/> unknown |
| <b>Sacubitril/Valsartan</b> (Entresto®)               | <input type="radio"/> yes <input type="radio"/> no | <input type="radio"/> unknown |
| <b>Amiodarone</b> (e.g. Cordarex®)                    | <input type="radio"/> yes <input type="radio"/> no | <input type="radio"/> unknown |
| <b>Other antiarrhythmics</b>                          | <input type="radio"/> yes <input type="radio"/> no | <input type="radio"/> unknown |
| <b>Beta blockers</b> (e.g. Bisoprolol)                | <input type="radio"/> yes <input type="radio"/> no | <input type="radio"/> unknown |
| <b>Calcium antagonists</b> (e.g. Amlodipine)          | <input type="radio"/> yes <input type="radio"/> no | <input type="radio"/> unknown |
| <b>Thiazides</b> (e.g. HCT)                           | <input type="radio"/> yes <input type="radio"/> no | <input type="radio"/> unknown |
| <b>Loop diuretics</b> (e.g. Torasemide)               | <input type="radio"/> yes <input type="radio"/> no | <input type="radio"/> unknown |
| <b>Cardiac glykosides</b> (e.g. Digoxin)              | <input type="radio"/> yes <input type="radio"/> no | <input type="radio"/> unknown |
| <b>Nitrates</b>                                       | <input type="radio"/> yes <input type="radio"/> no | <input type="radio"/> unknown |
| <b>Ranolazine</b> (e.g. Ranexa®)                      | <input type="radio"/> yes <input type="radio"/> no | <input type="radio"/> unknown |
| <b>Ivabradine</b> (e.g. Procoralan®)                  | <input type="radio"/> yes <input type="radio"/> no | <input type="radio"/> unknown |
| <b>Statin</b> (e.g. Atorvastatin)                     | <input type="radio"/> yes <input type="radio"/> no | <input type="radio"/> unknown |
| <b>Other lipid lowering drugs</b>                     | <input type="radio"/> yes <input type="radio"/> no | <input type="radio"/> unknown |

### 8.2. Anticoagulants (classification of current drugs)

|                                                                           |                                                    |                               |
|---------------------------------------------------------------------------|----------------------------------------------------|-------------------------------|
| <b>ASS</b>                                                                | <input type="radio"/> yes <input type="radio"/> no | <input type="radio"/> unknown |
| <b>Thienopyridines</b><br>(e.g.. Clopidogrel, Prasugrel, Ticagrelor)      | <input type="radio"/> yes <input type="radio"/> no | <input type="radio"/> unknown |
| <b>Vitamin K antagonists</b><br>(e.g. Phenprocoumon)                      | <input type="radio"/> yes <input type="radio"/> no | <input type="radio"/> unknown |
| <b>Direct oral antikoagulants</b><br>e.g. Apixaban, Edoxaban, Dabigatran) | <input type="radio"/> yes <input type="radio"/> no | <input type="radio"/> unknown |

|                                                                                   |                                                                               |             |
|-----------------------------------------------------------------------------------|-------------------------------------------------------------------------------|-------------|
|  | TEACH – Team-based treatment of coronary heart disease<br>BASELINE Assessment | Patient ID: |
|                                                                                   | <b>MEDICATION</b>                                                             | Date:       |

**8.3. Antidiabetics (classification of current drugs)**

- Insulin** yes no unknown  
**Oral antidiabetics** (e.g. Metformin) yes no unknown

**8.4. Analgesics (classification of current drugs)**

- NSAR** (e.g. Ibuprofen) yes no unknown  
**Opioids** (e.g. Tramadol, Oxycodone) yes no unknown

**8.5. Hormones (classification of current drugs)**

- Thyroid medications** yes no unknown  
**Oral contraceptives** yes no unknown  
**Other hormones** yes no unknown

**8.6. Psychotropics (classification of current drugs)**

**Antidepressants/anxiolytics**

- SSRIs** (e.g. Sertraline) yes no unknown  
**SSNRIs** (e.g. Venlafaxine) yes no unknown  
**Tricyclics** (e.g. Amitriptyline) yes no unknown  
**Tetracyclics** (e.g. Mirtazapine) yes no unknown  
**MAO inhibitors** (e.g. Tranylcypromine) yes no unknown  
**Agomelatin** (e.g. Valdoxan®) yes no unknown  
**Others**, Specify \_\_\_\_\_ yes no unknown

**Hypnotics/Tranquilizers**

- Benzodiazepines** ja no unknown  
**Zolpidem/Zopiclon** ja no unknown  
**Others**, Specify \_\_\_\_\_

|                                                                                   |                                                                               |             |
|-----------------------------------------------------------------------------------|-------------------------------------------------------------------------------|-------------|
|  | TEACH – Team-based treatment of coronary heart disease<br>BASELINE Assessment | Patient ID: |
|                                                                                   | <b>MEDICATION</b>                                                             | Date:       |

**Antipsychotics/neuroleptics**

**Phenothiazines** (e.g. Promethazine, Levomepromazine)      yes no      unknown

**Butyrophenones** (e.g. Pipamperone, Melperone, Haloperidol)      yes no      unknown

**Atypical antipsychotics** (e.g. Quetiapine, Risperidone)      yes no      unknown

**Others**, Specify \_\_\_\_\_

**8.7. Other drugs (not to be classified above)**

Please specify \_\_\_\_\_

|                                                                                   |                                                                               |             |
|-----------------------------------------------------------------------------------|-------------------------------------------------------------------------------|-------------|
|  | TEACH – Team-based treatment of coronary heart disease<br>BASELINE Assessment | Patient ID: |
|                                                                                   | <b>Dietary habits / Psychometric assessment</b>                               | Date:       |

***(Dietary habits will be assessed by the German version of the Mediterranean Diet Adherence Screener [MEDAS]: Hebestreit K, Yahiaoui-Doktor M, Engel C, Vetter W, Siniatchkin M, Erickson N, Halle M, Kiechle M, Bischoff SC. Validation of the German version of the Mediterranean Diet Adherence Screener (MEDAS) questionnaire. BMC Cancer. 2017;17:341.)***

***(Psychometric scales will include the HeartQoL, HADS, and PSS-4 as well as additional instruments listed in Table 4 of the main manuscript)***

|                                                                                   |                                                                                              |             |
|-----------------------------------------------------------------------------------|----------------------------------------------------------------------------------------------|-------------|
|  | TEACH – Team-based treatment of coronary heart disease                                       | Patient-ID: |
|                                                                                   | BASELINE-ASSESSMENT<br><b>SOCIO-DEMOGRAPHIC INFORMATION</b><br>Self-evaluation questionnaire | Date:       |

**1. What is your marital status? Please check one that applies to you.**

- Married/registered civil partnership
  - and living with my partner in one household
  - and not living with my partner in one household
  - and being separated without current partnership

- Not-married,  
no registered civil partnership
- Divorced
- Widowed

- 
- and living with my partner in one household
  - and having a partnership, but not a common household
  - and without current partnership

**2. What is your highest graduation certificate?**

**(Please check only the highest degree)**

- No graduation
- Secondary school qualification or equivalent qualification
- Secondary modern school qualification (medium maturity) or equivalent qualification
- Advanced college certificate
- High school graduation
- Other kind of graduation: \_\_\_\_\_

**3. What professional qualifications do you have?**

**(Please check only the highest degree)**

- No professional qualification
- Apprenticeship / vocational school / technical school completed
- Master's school, technical school, administrative and business academy or university of applied sciences completed
- Bachelor
- University diploma, master, magister, state examination, doctorate
- Other kind of qualification: \_\_\_\_\_

|                                                                                   |                                                                                   |             |
|-----------------------------------------------------------------------------------|-----------------------------------------------------------------------------------|-------------|
|  | TEACH – Team-based treatment of coronary heart disease<br><br>BASELINE-ASSESSMENT | Patient-ID: |
|                                                                                   | <b>SOCIO-DEMOGRAPHIC INFORMATION</b><br><b>Self-evaluation questionnaire</b>      | Date:       |

**4. What is your current employment?**

(Please note that employment means any paid or income-related activity)

- Full-time employment
- Part-time employment
- Partial retirement
- Mini job (up to 450 Euro/months)
- "One euro job" (and receiving unemployment benefit)
- Irregularly employed
- On educational leave (and receiving salary)
- Maternity/parental leave or other leave or absence
- Not employed (unemployed, early retirees, retirees without additional salary)

**5. What professional position do you have or did you have in your main job?**

- Self-employed business owner (farmer, in trade, the hospitality industry, handicraft, industry, service)
- Self-employed academic (physician, lawyer, tax consultant, etc.)
- Civil servant, judge or professional soldier
- White collar employee
- Blue collar worker
- Helping family members

**6. If you are not working full-time or part-time: Please tell us which group you belong to on this list.**

- Pensioners, retirees, in early retirement
- Unemployed
- Permanently disabled
- Housewives/Housemen
- Other: \_\_\_\_\_

|                                                                                   |                                                                                   |             |
|-----------------------------------------------------------------------------------|-----------------------------------------------------------------------------------|-------------|
|  | TEACH – Team-based treatment of coronary heart disease<br><br>BASELINE-ASSESSMENT | Patient-ID: |
|                                                                                   | <b>SOCIO-DEMOGRAPHIC INFORMATION</b><br><b>Self-evaluation questionnaire</b>      | Date:       |

**7. What is the total average monthly net income of your household?**

The average monthly net income of your household is comprised as follows: Combine all monthly wages, salaries, income from self-employment or pensions from your household (this may also include your spouse). Please also add the income from public subsidies, income from renting and leasing, assets, housing benefit, child benefit and other income on a monthly basis. Then deduct taxes and social security contributions. The result is your household net income.

- Less than 850 Euros
- 851 to less than 1 500 Euros
- 1 500 to less than 2 500 Euros
- 2 500 to less than 3 500 Euros
- 3 500 to less than 4 500 Euros
- 4500 Euros or more
- Not specified

**8. Did you apply for a pension or social security?**

no       yes

If yes, has it already been approved?

no       yes, since? \_\_\_\_ . \_\_\_\_ mm.yyyy

**9. What health insurance do you belong to?**

statutory    private    social welfare office



## T6 – Telephone assesment 6 months after V0

Pat. ID: \_\_\_\_\_

Site Code: \_\_\_\_\_

Date: \_\_\_\_\_

### Part A. SOCIO-DEMOGRAPHIC INFORMATION

1. „Has anything changed in your marital status in the **past 6 months?**“

no

yes

↳ „What has changed?“

Partner died

Seperated or divorced from partner

New registered civil partnership or newly married

↳  and live with my partner in one household

but not a common household

### Part B. CARDIOVASCULAR RISK FACTORS

2. Only if „no/unknown“ was answered in V0, Item 2.1: "Have you been diagnosed with diabetes mellitus in the meantime?"

yes

no

unknown

3. Only if „no/unknown“ was answered in V0, Item 2.2: " Have you been diagnosed with arterial hypertension (high blood pressure) in the meantime?"

yes

no

unknown

4. "Have you consumed nicotine in the past 6 months?"

no

unknown

Ex-smoker, since \_\_\_\_ . \_\_\_\_ mm.yyyy

yes

↳  only E-cigarettes

↳ "How many cigarettes do you smoke currently per day (incl. E-cigarettes)?" \_\_\_\_\_

5. "How many glasses of alcohol do you drink per week?"

(1 glass= 0,25l beer or 0,1l wine or 2cl liquor) \_\_\_\_\_(number)

low (<1 glass/week)

moderate (approx. 1-10 glasses/week)

high (>10 glasses/week)

## T6 – Telephone assesment 6 months after V0

Pat. ID: \_\_\_\_\_

Site Code: \_\_\_\_\_

Date: \_\_\_\_\_

### Part C. DIAGNOSES

6. "Have you had any new heart disease (myocardial infarction, heart failure, cardiac arrhythmias, fainting spells, other heart disease) in the past 6 months?"

yes

no

Myocardial infarction

Heart failure

Cardiac arrhythmias

Fainting spells

Other heart disease, which one? \_\_\_\_\_

7. "Have you had any new mental/psychosomatic illnesses in the past 6 months?"

yes, which one? \_\_\_\_\_

no

8. "Have you had any new physical illnesses in the past 6 months?"

yes, which one? \_\_\_\_\_

no

### Part D. CARDIOVASCULAR INTERVENTIONS

9. "Have you had any heart surgery/interventions in the past 6 months?"

yes

no

Percutaneous coronary revascularization

Coronary bypass surgery

Implanted cardiac pacemaker

Other cardiovascular interventions/surgery, which one? \_\_\_\_\_

Implanted defibrillator

„DC shock delivery?“

yes

no

unknown

If yes, adequate?  yes  no  unknown

            Number of shocks? \_\_\_\_\_

## T6 – Telephone assesment 6 months after V0

Pat. ID:

Site Code:

Date:

### Part E. UTILIZATION OF HEALTH CARE or PSYCHOTHERAPY

10. "How many physician consultations have you had in the past 6 months?"

Family physician, \_\_\_\_ consultations

Specialist, \_\_\_\_ consultations

11. "Have you been hospitalized in the past 6 months?"

yes

no

→ "Due to which disease, how often and for how long?"

Heart disease, Number \_\_\_\_\_, total number of days \_\_\_\_\_

Mental illness (including in-patient psychosomatic rehabilitation),  
Number \_\_\_\_\_, total number of days \_\_\_\_\_

Other reasons, Number \_\_\_\_\_, total number of days \_\_\_\_\_

### Part F. SAE

12. „Have you attempted to commit suicide in the past 6 months?"

yes

no

### Part G. DRUGS

13. "Has anything changed in your medication in the past 6 months?"

yes

nein

→ "What medication are you currently taking?"  
(List of current medications same as baseline)

### Part H. PSYCHOMETRIC ASSESSMENT

(Psychometric scales include HeartQoL, HADS, and PSS-4)

## V12 – In-person visit 12 months after V0

Pat. ID:

Site Code:

Date:

### Part A. SOCIO-DEMOGRAPHIC INFORMATION

1. „Has anything changed in your marital status in the **past 6 months?**“

no

yes

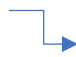

„What has changed?“

Partner died

Separated or divorced from partner

New registered civil partnership or newly married

and live with my partner in one household

but not a common household

2. "Has anything changed in you employment situation in the **past year?**"

no

yes

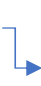

*(employment status same items as baseline)*

3. Only if „no/unknown“ was answered in V0, Item 8: "Did you apply for a pension or social security during the last year?"

no

yes

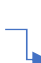

"Has it already been approved and since when?"

no

yes, since \_\_\_ . \_\_\_ mm.yyyy

### Part B. PHYSICAL EXAMINATION

4. Weight \_\_\_\_\_ kg

5. Waist circumference \_\_\_\_\_ cm

6. Blood pressure (*same as baseline*)

7. Heart rate (*same as baseline*)

8. Only for women if „no/unknown“ was answered in V0 Item 1.9: **Menopause**

yes

no

unknown

9. Other physical findings (*same as baseline*)

## V12 – In-person visit 12 months after V0

Pat. ID:

Site Code:

Date:

### Part C. CARDIOVASCULAR RISK FACTORS

10. Only if „no/unknown“ was answered in T6, Item 2. "Have you been diagnosed with diabetes mellitus in the meantime?"  
yes      no      unknown
11. Only if „no/unknown“ was answered in T6, Item 3: " Have you been diagnosed with arterial hypertension (high blood pressure) in the meantime?"  
yes      no      unknown
12. Only if „no/unknown“ was answered in T6, Item 4: " Have you been diagnosed with dyslipidemia in the meantime?"  
yes      no      unknown
13. "Have you consumed nicotine in the past 6 months?" (*same as T6*)
14. Alcoholic drinks per weeks (*same as baseline*)

### Part D. DIAGNOSES (*same as T6*)

### Part E. CARDIOVASCULAR INTERVENTIONS (*same as T6*)

### Part F. UTILIZATION OF HEALTH CARE or PSYCHOTHERAPY

19. "Have you received psychiatric or psychotherapeutic treatment in the **past year**?"  
yes      no  
                     → (*same options as baseline*)
20. "How many physician consultations have you had in the **past 6 months**?"  
Family physician, \_\_\_ consultations      Specialist, \_\_\_ consultations
21. "Have you been hospitalized in the past 6 months?"  
yes      no  
                     → (*same options as T6*)
22. "Have you participated in cardiac rehabilitation during the **past year**?"  
yes      no  
                     → „What kind of modality, how often and for how long?"

## V12 – In-person visit 12 months after V0

|          |            |       |
|----------|------------|-------|
| Pat. ID: | Site Code: | Date: |
|----------|------------|-------|

out-patient     
  in-patient     
  both

Number \_\_\_\_\_, total number of days \_\_\_\_\_

23. "Have you been unable to work during the past year?"

yes     
  no

→ „How often and for how long?"

Number \_\_\_\_\_, total number of days \_\_\_\_\_

### Part G. SAE

24. "Have how attempted suicide during the **past 6 months?**"

yes     
  no

### Part H. DRUGS

25. "Has anything changed in your medication in the past 6 months?"

yes     
  nein

→ "What medication are you currently taking?"  
*(List of current medications same as baseline)*

### Part I. DIET *(same as baseline)*

### Part J. PSYCHOMETRIC ASSESSMENT *(same as baseline)*

## V18– In-person visit 18 months after V0

Pat. ID:

Site Code:

Date:

### Part A. SOCIO-DEMOGRAPHIC INFORMATION

1. „Has anything changed in your marital status in the **past 6 months?**“ (*same as V12*)
2. "Has anything changed in you employment situation in the **past 6 months?**"
  - no       yes
  - ↳ (*employment status same items as baseline*)
3. Only if „no/unknown“ was answered in V12, Item 3: "Did you apply for a pension or social security during the last six months?" (*same options as V12*)

### Part B. PHYSICAL EXAMINATION (*same as V12*)

### Part C. CARDIOVASCULAR RISK FACTORS

10. Only if „no/unknown“ was answered in V12, Item 10: "Have you been diagnosed with diabetes mellitus in the meantime?"
  - yes      no      unknown
11. Only if „no/unknown“ was answered in V12, Item 11: " Have you been diagnosed with arterial hypertension (high blood pressure) in the meantime?"
  - yes      no      unknown
12. Only if „no/unknown“ was answered in V12, Item 12: "Have you been diagnosed with dyslipidemia in the meantime?"
  - yes      no      unknown
13. "Have you consumed nicotine in the past 6 months?" (*same as V12*)
14. Alcoholic drinks per weeks (*same as V12*)

### Part D. DIAGNOSES (*same as T6*)

### Part E. CARDIOVASCULAR INTERVENTIONS (*same as T6*)

### Part F. UTILIZATION OF HEALTH CARE or PSYCHOTHERAPY

19. "Have you received psychiatric or psychotherapeutic treatment in the **past 6 months?**"
  - yes      no
  - ↳ (*same options as baseline*)

## V18– In-person visit 18 months after V0

Pat. ID: \_\_\_\_\_

Site Code: \_\_\_\_\_

Date: \_\_\_\_\_

20. "How many physician consultations have you had in the **past 6 months**?"  
 Family physician, \_\_\_\_\_ consultations       Specialist, \_\_\_\_\_ consultations

21. "Have you been hospitalized in the past 6 months?"

yes       no

→ *(same options as V12)*

22. "Have you participated in cardiac rehabilitation during the **past 6 months**?"

yes       no

→ *(same options as T6)*

23. "Have you been unable to work during the past 6 months?"

yes       no

→ *(same options as T6)*

### Part G. SAE

24. "Have you attempted suicide during the **past 6 months**?"

yes       no

### Part H. DRUGS

25. "Has anything changed in your medication in the past 6 months?"

yes       no

→ "What medication are you currently taking?"  
*(List of current medications same as baseline)*

### Part I. DIET *(same as baseline)*

### Part J. PSYCHOMETRIC ASSESSMENT *(same as baseline)*



Pat. ID:

Site Code:

Date:

**Part A. DIAGNOSES** (same as T6)

**Part B. CARDIOVASCULAR INTERVENTIONS** (*same as T6*)

**Part C. SAE** (*same as T6*)

**Part D. DRUGS** (*same as T6*)

**Part E. PSYCHOMETRIC ASSESSMENT** (*same as T6*)

(If this is the last assessment, additional information will be obtained according to V12 on

- SOCIODEMOGRAPHICS
- CARDIOVASCULAR RISK FACTORS
- UTILIZATION)
